# Supplementary material
Source: Elsevier journal article supplement (https://www.sciencedirect.com/science/article/pii/S0300893215000573)
Supplement: mmc1 [file S0300893215000573:mmc1.pdf]

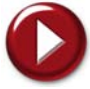

## Material suplementario

---

### **Calidad de la anticoagulación con antagonistas de la vitamina K en España: prevalencia de mal control y factores asociados**

Manuel Anguita Sánchez<sup>a,b,\*</sup>, Vicente Bertomeu Martínez<sup>a,c</sup> y Ángel Cequier Fillat<sup>a,d</sup>, en representación de los investigadores del estudio CALIFA<sup>◇</sup>

<sup>a</sup>*Agencia de Investigación, Sociedad Española de Cardiología, Madrid, España*

<sup>b</sup>*Servicio de Cardiología, Hospital Universitario Reina Sofía, Córdoba, España*

<sup>c</sup>*Servicio de Cardiología, Hospital Universitario de San Juan, San Juan de Alicante, Alicante, España*

<sup>d</sup>*Servicio de Cardiología, Hospital Universitario de Bellvitge, L'Hospitalet de Llobregat, Barcelona, España*

---

## Anexo 1

### Investigadores del estudio CALIFA

Eduardo Alegría-Ezquerro, Guipúzcoa. Francisco Albert-Bertrán, Girona. Antonio Álvarez-Vieitez, Madrid. Victor Amaro-Arroyo, Cádiz. Carmen Amorós-Galitó, Barcelona. Javier Andrés-Novales, Vizcaya. Manuel Anguita-Sánchez, Córdoba. José Antón-Lillo, Huelva. Xavier Armengol-Castells, Barcelona. Xabier Arrastio-López, Asturias. Luis Baragaño-Peña, Asturias. Moisés Barambio-Ruiz, Albacete. Antonio Barragán-Acea, Tenerife. Daniel Bartolomé-Mateos, Cádiz. Joseba Basurto-Hoyuelos, Vizcaya Ferrán Bernaus-Balasch, Barcelona. Gonzalo Barón-Esquívias, Sevilla. Nuria Batalla-Sahun, Barcelona. Joaquina Belchi-Navarro, Valencia. Vicente Bertomeu-Martínez, Alicante. Clara Bonand-Lozano, Valencia. Claudia Cabadés-Rumbeu, Valencia. Fernando Cabrera-Bueno, Málaga. Patricia Castellano-García, Jaén. Antonio Castilla-Núñez, Murcia. José Chopo-Alcubilla, Zaragoza. Miguel Cobos-Gil, Madrid. Carmen Corona-Barrio, Málaga. José Agustín-Loeches, Madrid. Juan Delgado-Bregel, Palencia. Mónica Delgado-Ortega, Córdoba. José Delgado-Prieto, Málaga. Javier Delso-Velázquez, Barcelona. Eva Díaz-Caraballo. Guadalajara. Jesús Domínguez-Calvo, León. Lester Duarte-Puig, Alicante. Tomás Echeverría-García, Guipúzcoa. Carmen Expósito-Pineda, Baleares. Javier Ezkurdia-Sasieta, Vizcaya. Ricardo Fajardo-Molina, Almería. Fabriciano Fernández-Cigoña, Pontevedra. José Fernández-Díaz, Madrid. Luis Fernández-Leoz, Asturias. Mónica Fernández-Valls, Cantabria. Montserrat Fernández-Vives, Lleida. Julio Flórez-Fuertes, León. Evaristo Freire-Castroseiros, Orense. Javier Fuertes-Beneitez, Madrid. Daniel Gaitán-Román, Málaga. José García-Acuña, A Coruña. Mariano García-Borbolla, Sevilla. Esteban García-Porrero, León. Arturo García-Touchard, Madrid. Iris Garrido-Bravo, Murcia. Ricardo Gayán-Laviña, Zaragoza. Paola Gil-Padrón, Las Palmas. Mónica Jiménez-Alcalá, Castellón. Juan Gómez-Doblas, Málaga. Carlos Gómez-Navarro, Almería. Manuel González-Ortega, Murcia. Guillermo Grau-Jornet, Alicante. Juan Gumá-González, Barcelona. Cristian Iborra-Cuevas, Madrid. Luis Iglesias-Alonso, Burgos. Enrique Iglesias-Río, A Coruña. Jaume Illa-Gay, Barcelona. Ricardo Izquierdo-González, Madrid. Juan Jiménez-Jáimez, Granada. Juan Lacal-Peña, Cádiz. Juan Lacalzada-Almeida, Tenerife. Álvaro Moreno-Reig, Ciudad Real. Luis López-Barreiro, A Coruña. Julio Marti-Amor, Barcelona. Segundo Mart-Llinares, Alicante. León

Martínez-Concha, Badajoz. José Marqués-Defez, Valencia. Rodrigo Medina-Alba, Pontevedra. Antonio Melero-Pita, Cuenca. José Merino-Llorens, Madrid. José Mesías-Prego, A Coruña. Beatriz Moreno-Djadou, Logroño. Javier Martín-Moreiras, Salamanca. Pedro Morillas-Blasco, Alicante. Beatriz Ordóñez-Rubio, Zaragoza. Plácido Orosa-Fernandez, Valencia. Juan Ortega-Bernal, Murcia. Juan Parra-Fuertes, Madrid. Marco Paz-Bermejo, Girona. Javier PérezAsenjo, Vizcaya. Carlos Pérez-Muñoz, Cádiz. Pedro Pericàs-Ramis, Baleares. Javier Poncela-Mirelles, Tenerife. Ana Portolés-Ocampo, Zaragoza. Hipolito Pousibet-Sanfeliu, Jaén. Jesús Prieto-Granda, Granada. Ester Recalde-Vigo, Vizcaya. Luis Rodríguez-Collado, Salamanca. Manuel Rodríguez-Revuelta, Sevilla. José Romero-Hinojosa, Granada. Mariano Ruiz-Borrell, Sevilla. José Rubio-Campal, Madrid. Martín Ruiz-Ortiz, Córdoba. Igor Sagasti-Aboitiz, Vizcaya. Ignacio Sainz-Hidalgo, Sevilla. Álvaro Sainz-Viard, Barcelona. José Santos-Iglesias, Zamora. Jesús Segovia-Castro, Pontevedra. José Segura-Saints-Gerons, Córdoba. Federico Segura-Villalobos, Las Palmas. Viviana Serra-Tomas, Madrid. Pedro Serrano-Aisa, Zaragoza. Juan Siles-Rubio, Málaga. Francisco Sogorb-Garri, Alicante. Néstor Torrealday-Taboada, Pontevedra. Francisco Torres-Calvo, Málaga. Javier Torres-Llergo, Jaén. Alfonso Valle-Muñoz, Alicante. Aida Valverde-Farre, Barcelona. Ángel Vidal-Tapia, Zaragoza. José Vega-Barbado, Valladolid. Jorge Vega-Fernández, Cáceres. FranciscoZumalde-Otegui, Vizcaya

## Anexo 2

### Definición de las principales variables del estudio

|                                     |                                                                                                                                                                                                                                                                                                  |
|-------------------------------------|--------------------------------------------------------------------------------------------------------------------------------------------------------------------------------------------------------------------------------------------------------------------------------------------------|
| Fibrilación auricular no valvular   | Fibrilación auricular de cualquier tipo en ausencia de una prótesis valvular, estenosis mitral reumática de cualquier grado o insuficiencia mitral significativa (grado moderado o grave)                                                                                                        |
| Fibrilación auricular paroxística   | Resolución espontánea, habitualmente en menos de 48 h y en todo caso < 1 semana                                                                                                                                                                                                                  |
| Fibrilación auricular persistente   | Episodio de fibrilación auricular que dura más de 1 semana o se termina con cardioversión (farmacológica o eléctrica). A efectos del estudio, se incluyen aquí también la fibrilación auricular persistente de larga duración (duración > 1 año cuando se decide estrategia de control de ritmo) |
| Fibrilación auricular permanente    | Fibrilación auricular como ritmo aceptado por el médico y el paciente, sin intentar control de ritmo                                                                                                                                                                                             |
| Estrategia de control de ritmo      | Forma de tratamiento que pretende mantener el ritmo sinusal mediante cardioversión eléctrica, ablación o fármacos                                                                                                                                                                                |
| Estrategia de control de frecuencia | Forma de tratamiento que pretende controlar la frecuencia ventricular manteniendo el ritmo de fibrilación auricular                                                                                                                                                                              |
| Escala de síntomas EHRA             | Clase I (sin síntomas); clase II (síntomas leves, sin alteración de la actividad cotidiana); clase III (síntomas graves que limitan la actividad cotidiana); clase IV                                                                                                                            |

|                                              |                                                                                                                                                                                                                                                                                                                                          |
|----------------------------------------------|------------------------------------------------------------------------------------------------------------------------------------------------------------------------------------------------------------------------------------------------------------------------------------------------------------------------------------------|
|                                              | (síntomas incapacitantes que impiden cualquier tipo de actividad).                                                                                                                                                                                                                                                                       |
| Muerte por evento cardiovascular             | Muerte debida a síndrome coronario agudo, insuficiencia cardíaca, muerte arrítmica o muerte súbita, rotura de aneurisma arterial o ictus.                                                                                                                                                                                                |
| Tromboembolia arterial                       | Fenómeno embólico en territorio arterial (excluido el pulmonar)                                                                                                                                                                                                                                                                          |
| Ictus isquémico                              | Déficit neurológico focal causado por isquemia, de inicio brusco y que persiste más de 24 h                                                                                                                                                                                                                                              |
| Accidente isquémico transitorio              | Déficit neurológico focal de inicio brusco y duración < 24 h                                                                                                                                                                                                                                                                             |
| Ictus hemorrágico                            | Déficit neurológico focal causado por sangrado intracraneal, de inicio brusco y que persiste más de 24 h                                                                                                                                                                                                                                 |
| Sangrados mayores                            | Hemorragia mortal o hemorragia sintomática en un órgano o área crítica (intracraneal, intraespinal, intraocular, retroperitoneal, intraarticular, pericárdica o intramuscular con síndrome compartimental) o sangrado que produzca descenso de la hemoglobina sérica $\geq 2$ g/dl o que precise transfusión sanguínea $\geq 2$ unidades |
| Embolia periférica                           | Embolia cerebral, en extremidades inferiores u ocular                                                                                                                                                                                                                                                                                    |
| Síndrome coronario agudo                     | Evento coronario agudo con alteraciones típicas del electrocardiograma y/o elevación enzimática                                                                                                                                                                                                                                          |
| Escala CHA <sub>2</sub> DS <sub>2</sub> VASc | Insuficiencia cardíaca (1 punto);                                                                                                                                                                                                                                                                                                        |

|                                       |                                                                                                                                                                                                                                                                                                                                                                   |
|---------------------------------------|-------------------------------------------------------------------------------------------------------------------------------------------------------------------------------------------------------------------------------------------------------------------------------------------------------------------------------------------------------------------|
|                                       | hipertensión arterial (1 punto); edad > 74 años (2 puntos); diabetes mellitus (1 punto); ictus previo (2 puntos); enfermedad vascular (infarto de miocardio previo, arteriopatía periférica, placa aórtica) (1 punto); edad entre 65 y 74 años (1 punto); sexo femenino (1 punto)                                                                                 |
| Escala CHADS <sub>2</sub>             | Insuficiencia cardiaca/disfunción ventricular izquierda (1 punto); hipertensión arterial (1 punto); edad > 75 años (1 punto); diabetes mellitus (1 punto); e ictus previo (2 puntos)                                                                                                                                                                              |
| Escala de riesgo hemorrágico HAS-BLED | Hipertensión arterial (1 punto); disfunción renal o hepática (1 punto cada una); ictus previo (1 punto); sangrado (previo, anemia, riesgo de sangrado aumentado, etc.) (1 punto); razón internacional normalizada lábil (1 punto); edad > 65 años (1 punto); toma concomitante de alcohol o fármacos (antiinflamatorios no esteroideos, antiagregantes) (1 punto) |
| Insuficiencia cardiaca                | Se considerará el diagnóstico de insuficiencia cardiaca para los pacientes que hayan tenido un ingreso por este motivo o hayan sido diagnosticados de insuficiencia cardiaca por el cardiólogo según los criterios de la Sociedad Europea de Cardiología                                                                                                          |
| Diabetes mellitus                     | Se considerará el diagnóstico de diabetes mellitus para los pacientes que estén recibiendo tratamiento con antidiabéticos orales y/o insulina o que, aunque no estén                                                                                                                                                                                              |

|                                         |                                                                                                                                                                                                                                                                                      |
|-----------------------------------------|--------------------------------------------------------------------------------------------------------------------------------------------------------------------------------------------------------------------------------------------------------------------------------------|
|                                         | en tratamiento farmacológico, cumplan los criterios de la <i>American Diabetes Association</i> de 2004, que define como diabéticos a los pacientes con glucemia en ayunas $\geq 126$ mg/dl en dos ocasiones y/o $\geq 200$ mg/dl a las 2 h de una sobrecarga oral de 75 g de glucosa |
| Hiperlipemia                            | Diagnóstico presente en la historia, con cLDL $> 130$ mg/dl y/o tratamiento actual con fármacos hipolipemiantes                                                                                                                                                                      |
| Enfermedad pulmonar obstructiva crónica | Se considerará el diagnóstico de enfermedad pulmonar obstructiva crónica para los pacientes con informe neumológico en el que conste este diagnóstico o una espirometría en que la FEVI sea $< 80\%$ del valor de referencia y la relación FEVI/capacidad vital forzada, $< 70\%$    |
| Anemia                                  | Se considerará el diagnóstico de anemia cuando las cifras de hemoglobina sean $< 12$ g/dl en la analítica realizada en los últimos 3 meses, cifras que se consideran el límite inferior de la normalidad en varones adultos y mujeres posmenopáusicas                                |
| Hipertensión arterial                   | Se considerará que un paciente es hipertenso cuando en la historia clínica haya varias cifras de presión arterial $\geq 140/90$ mmHg o cuando esté en tratamiento con fármacos antihipertensivos                                                                                     |
| Abuso de drogas y/o alcohol             | Ingesta habitual y abusiva de drogas psicotrópicas y/o alcohol, con registro documentado en la historia clínica de un                                                                                                                                                                |

|                                                   |                                                                                                                                                                                                                                                                                                                                                                                                                                                                                                                                                                                                                                                                           |
|---------------------------------------------------|---------------------------------------------------------------------------------------------------------------------------------------------------------------------------------------------------------------------------------------------------------------------------------------------------------------------------------------------------------------------------------------------------------------------------------------------------------------------------------------------------------------------------------------------------------------------------------------------------------------------------------------------------------------------------|
|                                                   | patrón desadaptativo que conlleve deterioro o malestar clínicamente significativos manifestado por uno (o más) de los siguientes, durante un periodo de 12 meses: incumplimiento de obligaciones en el trabajo, la escuela o en casa, consumo en situaciones en las que hacerlo es físicamente peligroso (p. ej., conducir un automóvil o accionar una máquina bajo los efectos de la sustancia), problemas legales repetidos relacionados (p. ej., arrestos por comportamiento escandaloso debido al alcohol/drogas) o consumo continuado a pesar de tener problemas sociales continuos o recurrentes o problemas interpersonales causados o exacerbados por sus efectos |
| Toma habitual de antiinflamatorios no esteroideos | Toma regular de estos fármacos al menos 1 vez a la semana                                                                                                                                                                                                                                                                                                                                                                                                                                                                                                                                                                                                                 |

cLDL: colesterol unido a lipoproteínas de baja densidad; FEVI: fracción de eyección del ventrículo izquierdo.
